# Supplementary material
Source: PubMed Central journal article supplement (PMC9274883)
Supplement: Supplemental_Table_1_and_Table_2.pdf [file Supplemental_Table_1_and_Table_2.pdf]

Table S1. Improvement of radiographic parameters on post-operative x-rays and maintenance of reduction on x-rays at union

|                                               | Early<br>n=50<br>mean (SD) | Delayed<br>n=25<br>mean (SD) | P-<br>value* | Adjusted<br>p-value** |
|-----------------------------------------------|----------------------------|------------------------------|--------------|-----------------------|
| <b>Radial height</b>                          |                            |                              |              |                       |
| Injury (mm)                                   | 7.3 (5.9)                  | 9.1 (4.6)                    | 0.188        |                       |
| First post-op (mm)                            | 10.7 (2.3)                 | 11.2 (2.3)                   | 0.348        |                       |
| Union (mm)                                    | 10.9 (2.3)                 | 11.2 (1.9)                   | 0.605        |                       |
| Surgical reduction ( $\Delta$ mm)             | 3.4 (5.6)                  | 1.8 (4.1)                    | 0.234        | 0.366                 |
| Maintenance of reduction ( $\Delta$ mm)       | 0.2 (1.1)                  | 0 (1.3)                      | 0.57         | 0.665                 |
| <b>Radial inclination</b>                     |                            |                              |              |                       |
| Injury x-rays ( $^{\circ}$ )                  | 14.2 (11.5)                | 17 (6.2)                     | 0.257        |                       |
| First post-op ( $^{\circ}$ )                  | 21.5 (4.4)                 | 21.6 (4.3)                   | 0.943        |                       |
| Union ( $^{\circ}$ )                          | 22.5 (4.6)                 | 22.3 (3.6)                   | 0.85         |                       |
| Surgical reduction ( $\Delta^{\circ}$ )       | 7.3 (10.8)                 | 4.2 (6.8)                    | 0.206        | 0.354                 |
| Maintenance of reduction ( $\Delta^{\circ}$ ) | 1.0 (2.2)                  | 0.8 (3.2)                    | 0.800        | 0.904                 |
| <b>Volar tilt</b>                             |                            |                              |              |                       |
| Injury ( $^{\circ}$ )                         | -16.9 (19.4)               | -14 (13.8)                   | 0.516        |                       |
| First post-op ( $^{\circ}$ )                  | 5.3 (8.3)                  | 2.9 (7.7)                    | 0.258        |                       |
| Union ( $^{\circ}$ )                          | 4.6 (8.2)                  | 2.9 (10.7)                   | 0.451        |                       |
| Surgical reduction ( $\Delta^{\circ}$ )       | 22.1 (20.1)                | 17.1 (15.5)                  | 0.287        | 0.510                 |
| Maintenance of reduction ( $\Delta^{\circ}$ ) | -0.7 (8.1)                 | -1.2 (11.3)                  | 0.812        | 0.793                 |

\*t-test

\*\* linear regression, adjusted for time and institution

Table S2. Articular step-off

|         | Intra-articular fractures (n) | Displacement $\geq$ 2mm (%) |         |         |
|---------|-------------------------------|-----------------------------|---------|---------|
|         |                               | Initial                     | Post-op | Union   |
| Delayed | 9                             | 7 (78%)                     | 1 (11%) | 1 (11%) |
| Early   | 20                            | 13 (65%)                    | 2 (10%) | 2 (10%) |
